# Supplementary material
Source: PubMed Central journal article supplement (PMC4285543)
Supplement: supp_fj.14-251991_Supplemental_Figures.pdf [file supp_fj.14-251991_Supplemental_Figures.pdf]

**Figure S1**

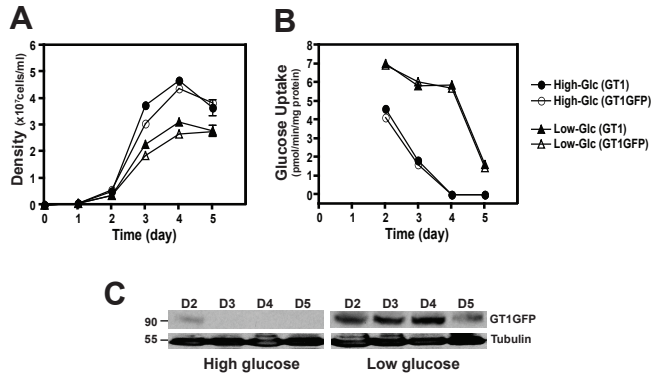

**Figure S2**

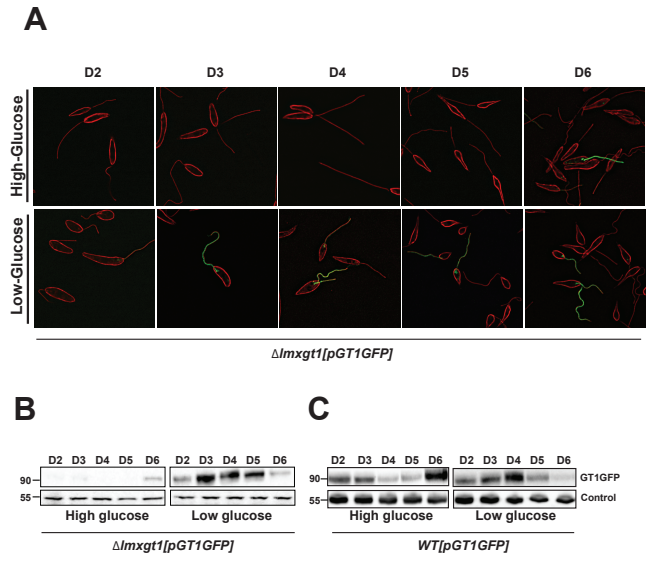

**Figure S3**

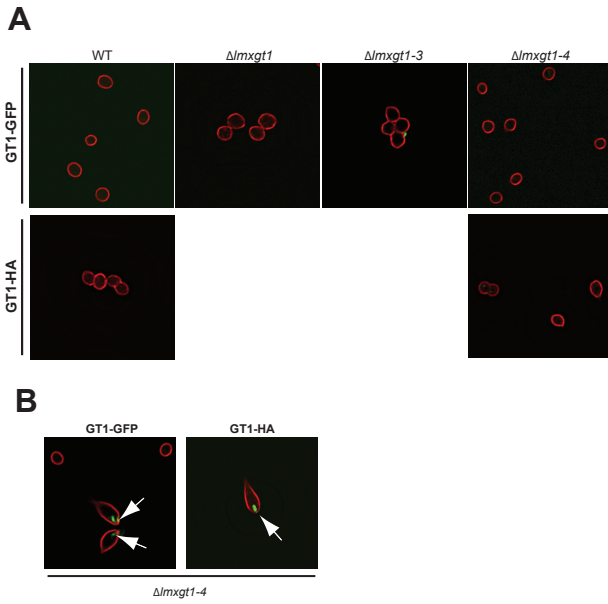

**Figure S4**

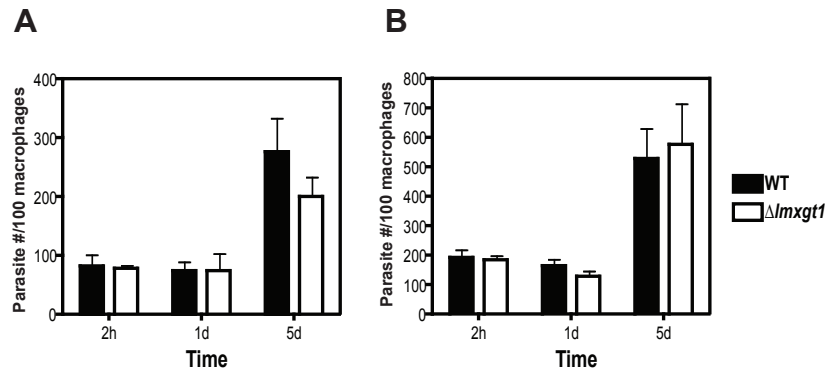

**Fig. S1.** Expression of untagged LmxGT1 and LmxGT1-GFP as a function of days in culture and in the presence of high or low glucose. Each *LmxGT1* gene was expressed in the  $\Delta mxgt1-3$  null mutant background. A) Cell density for each transgenic null mutant was quantified in triplicate samples with values plotted representing the average and standard deviations (error bars) for each sample. Parasites were inoculated at a density of  $2 \times 10^5$  cells/ml and grown for 5 days in RPMI medium containing high (10 mM) or low (0.5 mM) initial glucose. B) The rate of uptake of  $100 \mu\text{M}$  [ $^3\text{H}$ ]D-glucose by each transgenic line as a function of days of growth and high or low glucose. C) Western blot of total lysates from  $\Delta mxgt1-3[pGT1-GFP]$  parasites probed with anti-GFP antibody. Samples were taken from day 2 to day 5 (D2-D5). The control band represents  $\alpha$ -tubulin (Tubulin).

**Fig. S2.** Episomal expression of LmxGT1-GFP in  $\Delta mxgt1$  and wild type background. A) Immunofluorescence images of  $\Delta mxgt1$  null mutant parasites expressing LmxGT1-GFP. Parasites were inoculated at a density of  $1 \times 10^5$  cells/ml and grown for 6 days in RPMI medium containing high (10 mM) or low (0.5 mM) initial glucose. Samples were withdrawn at days 2, 3, 4, 5, and 6 (D2-D6) for fixation and imaging by deconvolution microscopy. Promastigotes were stained with anti- $\alpha$ -tubulin and Alexa-594 conjugated antibodies (red) to visualize the subpellicular microtubule network. Green represents GFP fluorescence. B, C) Western blot of total cell lysates from  $\Delta mxgt1[pGT1-GFP]$  (B) or WT[*pGT1-GFP*] (C) promastigotes growing in high and low glucose. Western blots were probed with anti-GFP antibody. The Control bands in the lower panel represent  $\alpha$ -tubulin.

**Fig. S3.** Expression of LmxGT1-GFP and LmxGT1-HA is not detected by immunofluorescence microscopy in axenic amastigotes. A) Immunofluorescence images of wild type (WT) and several null mutant parasites, expressing LmxGT1-GFP (WT,  $\Delta$ *lmxgt1*,  $\Delta$ *lmxgt1-3* and  $\Delta$ *lmxgt1-4*) or LmxGT1-HA (WT and  $\Delta$ *lmxgt1-4*) from an episomal expression vector. Images were taken by deconvolution microscopy. Axenic amastigotes were stained with anti- $\alpha$ -tubulin and Alexa-594 conjugated antibodies (red) to visualize the subpellicular microtubule network. Green represents GFP fluorescence in cell lines expressing LmxGT1-GFP. Cell lines expressing LmxGT1-HA were stained with anti-HA and Alexa-488 conjugated antibodies (green) to visualize the HA-tagged protein. B) Detection of LmxGT1-GFP and LmxGT1-HA in parasites that had not transformed into amastigotes. Cultures of axenic amastigotes typically contain a small percentage of parasites that have a body shape similar to promastigotes but do not have an extended flagellum. These parasites likely have not transformed completely into axenic amastigotes and often exhibit fluorescence from LmxGT1-GFP or LmxGT1-HA in the region of the flagellar pocket. Fusion proteins were expressed in the  $\Delta$ *lmxgt1-4* background

**Fig. S4.** Macrophage infection by wild type and  $\Delta$ *lmxgt1* promastigotes that had been pasaged through mice. Primary peritoneal macrophages from BALB/c mice were infected with stationary-phase promastigotes at a multiplicity of 2 (A) or 5 (B) and incubated in Dulbecco's modified Eagle Medium at 37°C for 2 h, 1 day or 5 days, as described in the Material and Methods section. Data represent the average and range of two independent experiments. Data are plotted as number of parasites per 100 macrophages. Wild type (WT) is shown as black bars and  $\Delta$ *lmxgt1* parasites as white bars.
